# Supplementary material for: Study and Choice of Water Saturation Test Method for Tight Sandstone Gas Reservoirs
Source: Frontiers journal article supplement (doi:10.3389/fphy.2022.833940), 2022-03-03
Supplement: Table_1.DOCX [file Table_1.DOCX]

Supplementary Material

# Supplementary Tables

# Table S1

Sample information.

| No. | Porosity, % | Permeability, 10-3μm2 |
| --- | --- | --- |
| 1 | 5.1 | 0.308 |
| 2 | 6.9 | 0.0693 |
| 3 | 7.1 | 0.134 |
| 4 | 10.5 | 27.8 |
| 5 | 9.6 | 6.37 |
| 6 | 5.1 | 0.0853 |
| 7 | 7.8 | 0.719 |
| 8 | 10.8 | 3.590 |
| 9 | 7.6 | 0.541 |
| 10 | 8.6 | 0.0533 |
| 11 | 2.6 | 0.110 |
| 12 | 13.7 | 2.97 |
| 13 | 16.3 | 4.56 |
| 14 | 13.5 | 2.09 |
| 15 | 14.6 | 1.77 |
| 16 | 15 | 2.14 |
| 17 | 15.4 | 5.64 |
| 18 | 16.3 | 6.99 |
| 19 | 13.6 | 2.34 |
| 20 | 9.1 | 1.79 |
| 21 | 12.7 | 1.80 |
| 22 | 9.5 | 0.405 |
| 23 | 10.7 | 0.414 |
| 24 | 7.7 | 0.296 |
| 25 | 9.0 | 0.271 |
| 26 | 9.5 | 0.505 |
| 27 | 8.9 | 0.407 |
| 28 | 5.8 | 0.343 |
| 29 | 10.3 | 0.540 |
| 30 | 8.4 | 0.381 |
| 31 | 10.1 | 0.277 |
| 32 | 10.0 | 0.142 |
| 33 | 8.4 | 0.108 |
| 34 | 9.7 | 0.114 |
| 35 | 7.6 | 0.121 |
| 36 | 10.4 | 0.293 |
| 37 | 8.5 | 0.149 |
| 38 | 9.2 | 0.648 |
| 39 | 10.5 | 0.469 |
| 40 | 8.4 | / |
| 41 | 8.0 | / |
| 42 | 8.0 | / |
| 43 | 7.8 | / |
| 44 | 8.2 | / |
| 45 | 7.1 | / |
| 46 | 7.4 | / |
| 47 | 7.8 | / |
| 48 | 7.9 | / |
| 49 | 10.2 |  |
